# Supplementary material
Source: Springer Nature journal article supplement (https://www.springermedizin.de/resource/supplementary/12874_2011_654_MOESM6_ESM.pdf/9432334)
Supplement: MOESM6 [file 9432334]

# Conditional Probabilities of Intracranial\_lesions

| Probability |       |
|-------------|-------|
| 1           | 0     |
| 0.076       | 0.923 |
